# Supplementary material
Source: PubMed Central journal article supplement (PMC7418503)
Supplement: Supplementary_Data.pdf [file Supplementary_Data.pdf]

Table SI. MAGE-A genomic information in patients with laryngeal squamous cell carcinoma.

| Patient no. | MAGE-A1 | MAGE-A2 | MAGE-A3 | MAGE-A4 | MAGE-A6 | MAGE-A9 | MAGE-A-11 |
|-------------|---------|---------|---------|---------|---------|---------|-----------|
| 1           | -       | -       | +       | -       | +       | +       | -         |
| 2           | +       | +       | +       | +       | +       | -       | -         |
| 3           | -       | -       | -       | -       | -       | -       | -         |
| 4           | -       | -       | -       | -       | -       | -       | +         |
| 5           | -       | -       | -       | -       | -       | +       | -         |
| 6           | +       | +       | -       | -       | -       | +       | +         |
| 7           | -       | +       | +       | +       | -       | +       | -         |
| 8           | -       | -       | -       | -       | -       | -       | +         |
| 9           | -       | -       | -       | -       | -       | -       | -         |
| 10          | +       | +       | +       | -       | -       | +       | +         |
| 11          | -       | -       | -       | -       | -       | +       | -         |
| 12          | -       | +       | +       | -       | -       | -       | -         |
| 13          | -       | -       | -       | -       | -       | -       | -         |
| 14          | -       | -       | -       | -       | -       | +       | +         |
| 15          | -       | -       | -       | -       | -       | +       | +         |
| 16          | -       | -       | +       | +       | +       | +       | +         |
| 17          | +       | -       | -       | +       | -       | -       | -         |
| 18          | -       | +       | -       | -       | +       | +       | +         |
| 19          | -       | +       | -       | -       | -       | +       | +         |
| 20          | -       | -       | -       | -       | -       | +       | +         |
| 21          | -       | -       | -       | -       | -       | -       | -         |
| 22          | -       | -       | -       | -       | -       | +       | -         |
| 23          | -       | -       | -       | -       | -       | -       | -         |
| 24          | -       | -       | -       | -       | -       | -       | -         |
| 25          | -       | -       | -       | -       | -       | -       | -         |
| 26          | -       | -       | -       | -       | -       | -       | +         |
| 27          | +       | +       | +       | -       | +       | +       | +         |
| 28          | +       | +       | -       | +       | +       | -       | +         |
| 29          | +       | -       | +       | +       | +       | +       | +         |
| 30          | -       | -       | -       | -       | -       | +       | -         |
| 31          | -       | -       | -       | -       | -       | -       | +         |
| 32          | +       | -       | -       | +       | +       | +       | +         |
| 33          | +       | -       | +       | +       | -       | +       | -         |
| 34          | +       | -       | -       | -       | +       | -       | +         |
| 35          | -       | -       | -       | -       | -       | -       | -         |
| 36          | -       | -       | -       | -       | -       | -       | -         |
| 37          | -       | -       | -       | -       | -       | -       | -         |
| 38          | +       | +       | +       | +       | -       | -       | -         |
| 39          | -       | -       | -       | -       | -       | +       | -         |
| 40          | +       | +       | +       | +       | -       | -       | -         |
| 41          | -       | -       | -       | -       | -       | -       | -         |
| 42          | -       | -       | -       | -       | -       | -       | -         |
| 43          | -       | -       | -       | -       | -       | -       | -         |
| 44          | -       | -       | -       | -       | -       | -       | -         |
| 45          | +       | +       | +       | -       | -       | +       | -         |
| 46          | -       | +       | -       | -       | +       | -       | +         |
| 47          | -       | -       | +       | +       | -       | -       | +         |
| 48          | -       | -       | +       | -       | -       | -       | -         |
| 49          | -       | -       | -       | -       | -       | -       | -         |
| 50          | +       | -       | +       | +       | -       | +       | +         |
| 51          | -       | -       | -       | -       | -       | -       | -         |
| 52          | -       | -       | -       | -       | -       | -       | -         |
| 53          | -       | -       | -       | -       | -       | +       | -         |
| 54          | +       | +       | +       | +       | +       | -       | -         |
| 55          | -       | -       | -       | -       | -       | -       | -         |
| 56          | -       | -       | -       | -       | -       | -       | -         |
| 57          | -       | -       | +       | -       | -       | -       | -         |

Table SI. Continued.

| Patient no. | MAGE-A1 | MAGE-A2 | MAGE-A3 | MAGE-A4 | MAGE-A6 | MAGE-A9 | MAGE-A11 |
|-------------|---------|---------|---------|---------|---------|---------|----------|
| 58          | -       | -       | -       | -       | -       | -       | -        |
| 59          | -       | -       | -       | -       | -       | -       | -        |
| 60          | -       | -       | -       | -       | -       | -       | -        |
| 61          | -       | -       | -       | -       | -       | -       | +        |
| 62          | -       | -       | -       | -       | -       | -       | -        |
| 63          | -       | -       | -       | -       | -       | -       | -        |
| 64          | -       | +       | +       | +       | -       | +       | +        |
| 65          | -       | -       | -       | -       | -       | -       | -        |
| 66          | -       | -       | -       | -       | -       | -       | -        |
| 67          | -       | -       | -       | -       | -       | -       | -        |
| 68          | -       | -       | -       | -       | -       | -       | -        |
| 69          | -       | -       | -       | -       | -       | -       | -        |
| 70          | -       | +       | -       | -       | -       | -       | -        |
| 71          | +       | -       | +       | +       | +       | -       | -        |
| 72          | -       | -       | -       | -       | -       | -       | -        |
| 73          | -       | -       | -       | -       | -       | -       | -        |
| 74          | -       | -       | -       | -       | -       | -       | -        |
| 75          | -       | -       | -       | -       | -       | -       | +        |
| 76          | -       | -       | -       | -       | -       | -       | -        |
| 77          | -       | -       | -       | -       | -       | -       | -        |
| 78          | -       | -       | -       | -       | -       | +       | +        |
| 79          | -       | -       | -       | -       | -       | -       | -        |
| 80          | -       | -       | -       | -       | -       | -       | -        |
| 81          | -       | -       | -       | -       | -       | -       | -        |
| 82          | -       | -       | -       | -       | -       | -       | -        |
| 83          | -       | -       | -       | -       | -       | +       | +        |
| 84          | -       | -       | -       | -       | -       | -       | +        |
| 85          | -       | -       | -       | -       | -       | -       | -        |
| 86          | -       | -       | -       | -       | -       | -       | +        |
| 87          | +       | +       | -       | +       | -       | -       | -        |
| 88          | -       | +       | +       | -       | -       | -       | -        |
| 89          | -       | -       | -       | -       | -       | -       | -        |
| 90          | -       | -       | -       | -       | -       | -       | -        |
| 91          | -       | +       | -       | -       | -       | -       | -        |
| 92          | +       | +       | -       | -       | -       | -       | -        |
| 93          | -       | -       | +       | -       | -       | -       | +        |
| 94          | -       | -       | -       | -       | -       | -       | -        |
| 95          | -       | -       | -       | -       | -       | -       | -        |
| 96          | -       | -       | -       | -       | -       | -       | -        |
| 97          | -       | -       | -       | -       | -       | -       | -        |
| 98          | -       | -       | -       | -       | -       | -       | -        |
| 99          | -       | -       | -       | -       | -       | -       | -        |
| 100         | -       | -       | -       | -       | -       | -       | -        |
| 101         | +       | +       | -       | -       | -       | +       | -        |
| 102         | -       | -       | -       | -       | -       | +       | +        |
| 103         | -       | -       | -       | -       | -       | -       | -        |
| 104         | -       | -       | -       | -       | -       | -       | -        |

MAGE, melanoma-associated antigen.
